# Supplementary material for: The Use of Data from the Parkinson’s KinetiGraph to Identify Potential Candidates for Device Assisted Therapies
Source: PubMed Central journal article supplement (PMC6568025; doi:10.3390/s19102241), 2019-05-15
Supplement: sensors-19-02241-s001.pdf [file sensors-19-02241-s001.pdf]

Supplementary Materials:

Table S1. The clinical and PKG characteristics of PwP in the Construction and Test Sets.

|             | Construction Set N = 112 |                  |          | Test Set N = 60  |                 |          |
|-------------|--------------------------|------------------|----------|------------------|-----------------|----------|
|             | CP                       | CN               | $\Delta$ | CP               | CN              | $\Delta$ |
| Age         | 63 (55–70)               | 72 (67–77)       | 9        | 64.7 (59.3–71)   | 67 (62–73)      | -2.7     |
| UPDRS I     | 6 (3–11)                 | 7 (5.5–12.5)     | -1       | 6 (3–10.5)       | 8.5 (3.7–16.7)  | -1.5     |
| UPDRS II    | 13 (10–20)               | 6 (3–11)         | 7        | 12 (10–18)       | 7.5 (5.2–13.7)  | 4.5      |
| UPDRS III   | 25 (17–38)               | 27.5 (20–34.7)   | -2.5     | 31 (20–34)       | 20 (17–35)      | 11       |
| UPDRS IV    | 7 (4.5–9)                | 1 (0–4)          | 6        | 6 (2.5–8.5)      | 1 (0–4)         | 5        |
| UPDRS Total | 52 (40–77)               | 44 (32.2–57.5)   | 8        | 53.5 (43.5–64)   | 38.5 (31–50.7)  | 5        |
| Median BKS  | 20.7 (16–25.3)           | 23.7 (21.5–26.8) | -3       | 21.4 (17.2–25.4) | 24.7 (23–28)    | -3.3     |
| PTB         | 36.9 (17.8–50.8)         | 42.8 (33.3–61.6) | -5.9     | 36.8 (18.2–56.4) | 51.3 (44–72.2)  | -14.5    |
| Median DK   | 4.8 (2.3–14.9)           | 2.3 (1–4)        | 2.5      | 6.2 (2.6–12.8)   | 1 (0.7–2.8)     | 5.2      |
| PTD         | 24.7 (10.2–48.5)         | 8.3 (3.7–15)     | 16.4     | 23.3 (10–46.4)   | 4.8 (1.7–11)    | 18.5     |
| DBSS        | 99.5 (84.8–100)          | 7.9 (1.4–43)     | 91.6     | 95.4 (73.6–99.9) | 18.7 (0.4–51.1) | 76.7     |
| Doses/day   | 5.5 (5–7)                | 4 (3–5)          | 1.5      | 5 (4–6)          | 4 (3–4)         | 1        |
| PTT         | 0.8 (0.3–2.1)            | 0.8 (0.4–2)      | 0        | 1.1 (0.3–2.6)    | 1 (0.4–1.9)     | 0.1      |
| PTI         | 4.4 (2–6.6)              | 4.3 (2.2–8.6)    | 0.1      | 3.2 (0.9–7.3)    | 5.8 (2.9–9.9)   | -2.6     |
